# Supplementary material for: Endonuclease V Regulates Atherosclerosis Through C‐C Motif Chemokine Ligand 2‐Mediated Monocyte Infiltration
Source: PubMed Central journal article supplement — J Am Heart Assoc. 2021 Jul 14;10(14):e020656. doi: 10.1161/JAHA.120.020656 (PMC8483470; doi:10.1161/jaha.120.020656), 2021-07-14
Supplement: JAH3-10-e020656-s001.pdf [file JAH3-10-e020656-s001.pdf]

# **SUPPLEMENTAL MATERIAL**

**Table S1. Characteristics of patients with ischemic stroke and healthy controls (PBMC).**

|                                     | <b>Patients<br/>n=24</b> | <b>Controls<br/>n=33</b> | <b>p</b> |
|-------------------------------------|--------------------------|--------------------------|----------|
| Age, years                          | 67.3±11.4                | 66.6±6.3                 | 0.78     |
| Sex male, % (n)*                    | 66.7 (16)                | 66.7 (22)                | 1.00     |
| Smokers, % (n)*                     | 25 (6)                   | -                        |          |
| Diabetes, % (n)*                    | 12.5 (3)                 | -                        |          |
| Hypertension, % (n)*                | 70.9 (17)                | -                        |          |
| Anti-platelet treatment, % (n)*     | 79.2 (19)                | -                        |          |
| Statin treatment, % (n)*            | 70.8 (17)                | -                        |          |
| Leukocyte count, 10 <sup>9</sup> /L | 8.4±1.8                  | 5.8±1.2                  | 0.084    |
| Platelets, 10 <sup>9</sup> /L       | 234±107                  | 256±61                   | 0.332    |
| CRP, mg/L                           | 8.1±13.6                 | 2.3±2.7                  | 0.025    |
| Total cholesterol, mmol/L           | 4.3±1.6                  | 6.0±1.1                  | <0.001   |
| LDL, mmol/L                         | 2.6±1.0                  | 3.8±0.9                  | <0.001   |
| TG, mmol/L                          | 1.4±0.7                  | 1.4 ±1.0                 | 0.950    |
| HDL, mmol/L                         | 1.3 ±0.4                 | 1.7±0.5                  | 0.002    |
| Creatinin, µmol/L                   | 82.4±27.9                | 72.7±11.7                | 0.311    |
| HbA1c, %                            | 6.1±0.9                  | 5.7±0.3                  | 0.009    |

The values are given as mean (±SD) or \* percentage (number).

CRP= high sensitivity C-reactive protein, LDL= low density lipoprotein, HDL= high density lipoprotein, HbA1c= Haemoglobin A1c.

**Table S2. primer sequences used in RT-qPCR.**

| <b>primer</b>             | <b>sequence</b>          |
|---------------------------|--------------------------|
| hEndoV (F)                | TTCCCTGAGCTCGAGGTGGTGT   |
| hENDO V (R)               | CCATCCACAAGAAGGACCTGGG   |
| hCD45 (F)                 | CCCCATGAACGTTACCATTTG    |
| hCD45 (R)                 | GTCTCCATTGTGAAAATAGGCCTT |
| hADARp150 (F)             | GCCGCCCTTTGAGAACTCT      |
| hADARp150 (R)             | TGAGCATAGCAAGTGGAGATACC  |
| hCD47 (F)                 | AGAAGGTGAAACGATCATCGAGC  |
| hCD47 (R)                 | CTCATCCATACCACCGGATCT    |
| hbeta-act (F)             | AGGCACCAGGGCGTGAT        |
| Hbeta-act (R)             | TCGTCCCAGTTGGTGACGAT     |
| <b>Genotyping Primers</b> |                          |
| ApoE (F)                  | GCCTAGCCGAGGGAGAGCCG     |
| ApoE (R)                  | TGTGACTTGGGAGCTCTGCAGC   |
| ApoE <sup>-/-</sup> (R)   | GCCGCCCCGACTGCATCT       |
| EndoV (F)                 | AGCCAGGAGTACAAGGAGCA     |
| EndoV (R)                 | GCAAGTGGGTGTTGGAGAGT     |
| EndoV <sup>-/-</sup> (R)  | GGGGAACCTCCTGACTAGGG     |

**Table S3. Subgrouping of carotid patients.**

| <b>Time from symptom onset</b> | <b>N</b> | <b>Relative <i>EndoV</i> mRNA levels Mean (SD)</b> |
|--------------------------------|----------|----------------------------------------------------|
| >6 mnth                        | 40       | 0.69 (0.48)                                        |
| >2 mnth and <6 mnth            | 24       | 0.65 (0.28)                                        |
| > 1 and < 2 mnth               | 25       | 0.54 (0.27)                                        |
| < 1 mnth                       | 74       | 0.61 (0.31)                                        |

The values are given as mean ( $\pm$ SD).

**Table S4. Circulating inflammatory markers in *EndoV*<sup>-/-</sup>*ApoE*<sup>-/-</sup> compared to *ApoE*<sup>-/-</sup> mice.**

|                      | <i>ApoE</i> <sup>-/-</sup><br>n=4 | <i>ApoE</i> <sup>-/-</sup> <i>EndoV</i> <sup>-/-</sup><br>n=4 | P    |
|----------------------|-----------------------------------|---------------------------------------------------------------|------|
| IFN $\gamma$ , pg/mL | 0.39 $\pm$ 0.39                   | 0.29 $\pm$ 0.13                                               | 0.42 |
| IL-10, pg/mL         | 3.80 $\pm$ 0.74                   | 3.05 $\pm$ 0.62                                               | 0.17 |
| IL-4, pg/mL          | 0.27 $\pm$ 0.19                   | 0.35 $\pm$ 0.30                                               | 0.81 |
| IL-5, pg/mL          | 9.12 $\pm$ 4.37                   | 8.33 $\pm$ 3.79                                               | 0.79 |
| CXCL1, pg/mL         | 66.86 $\pm$ 47.98                 | 53.76 $\pm$ 19.92                                             | 0.63 |
| TNF, pg/mL           | 43.49 $\pm$ 4.49                  | 36.24 $\pm$ 11.71                                             | 0.29 |
| Triglyceride, mg/dL  | 80.03 $\pm$ 13.83                 | 92.37 $\pm$ 29.53                                             | 0.48 |
| Cholesterol, mg/dL   | 728.36 $\pm$ 181.89               | 720.89 $\pm$ 257.35                                           | 0.96 |

INF=I nterferon, IL= interleukin, CXCL1= C-X-C motif chemokine ligand 1, TNF= tumor necrosis factor.

**Figure S1. Genotyping of the *ApoE*<sup>-/-</sup>*EndoV*<sup>-/-</sup> mice.**

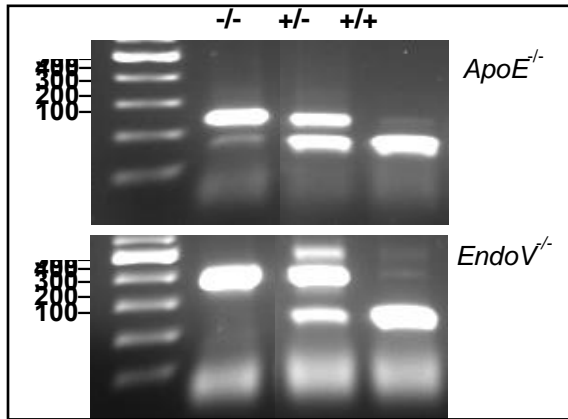

Genotyping of *ApoE*<sup>-/-</sup>*EndoV*<sup>-/-</sup> mice by PCR. Expected size are 254 bp for *ApoE*<sup>-/-</sup>, 155 bp for *ApoE*<sup>+/+</sup> (upper panel), 400 bp for *EndoV*<sup>-/-</sup> and 216 for *EndoV*<sup>+/+</sup> (lower panel).
